# Supplementary material
Source: publisher figshare collection journal article supplement (https://plos.figshare.com/articles/dataset/_/3914580)
Supplement: Supplementary file [file 1]

25 **S2 Fig. Phenotypic distribution of ETF.**

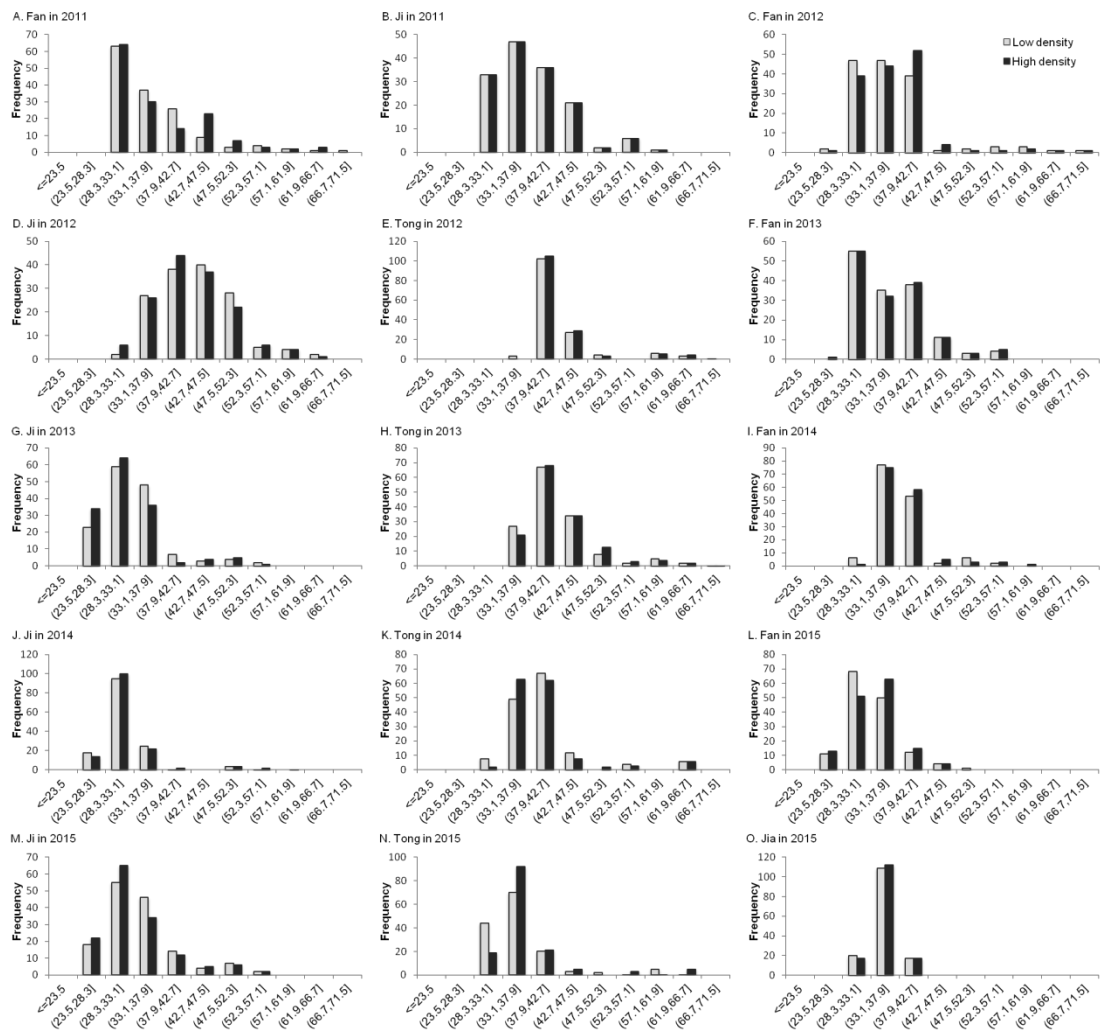

26  
27
