# Supplementary material
Source: publisher figshare collection journal article supplement (https://plos.figshare.com/articles/dataset/_/3914580)
Supplement: Supplementary file [file 1]

15 **S3 Table. Analysis of molecular variance (AMOVA) and  $F_{ST}$  for two**  
 16 **subpopulations of soybean accessions inferred from STRUCTURE.**

| Source of variation | Degree of<br>freedom | Sum of<br>squares | Variance<br>components | Percentage of<br>variance<br>components |
|---------------------|----------------------|-------------------|------------------------|-----------------------------------------|
| Among populations   | 1                    | 14091.91          | 93.60                  | 17.64                                   |
| Within populations  | 274                  | 126727.47         | 436.99                 | 82.36                                   |
| Total               | 275                  | 140819.38         | 530.59                 |                                         |

17 Population pair-wise  $F_{ST}$ : 0.18 (P<0.001).

18
