# Supplementary material
Source: publisher figshare collection journal article supplement (https://plos.figshare.com/articles/dataset/_/3914580)
Supplement: Supplementary file [file 1]

19 **S1 Fig. Kinship value between accessions among population.**

20

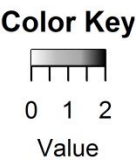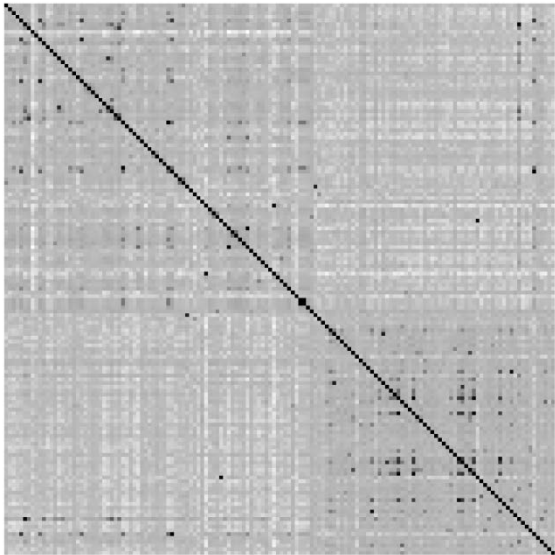

21

22 Each pixel in the square indicates the kinship value of corresponding individual pair as shown  
23 on the above bar.

24
