# Supplementary material
Source: publisher figshare collection journal article supplement (https://plos.figshare.com/articles/dataset/_/3914580)
Supplement: Supplementary file [file 1]

1 **S1 Table. Analysis of variance (ANOVA) of the three traits across 15 low-dense**  
2 **plant environments.**

3

| Trait <sup>a</sup> | Source <sup>b</sup> | DF <sup>c</sup> | Sum of Square | Mean Square | <i>F</i> Value | Pr > <i>F</i> |
|--------------------|---------------------|-----------------|---------------|-------------|----------------|---------------|
| ETF                | Env                 | 14              | 51865.26      | 3704.66     | 804.36         | <.0001        |
|                    | Block(Env)          | 15              | 315.34        | 21.02       | 4.56           | <.0001        |
|                    | Geno                | 145             | 103709.42     | 715.24      | 155.29         | <.0001        |
|                    | Geno*Env            | 2030            | 35202.07      | 17.34       | 3.77           | <.0001        |
| FTM                | Env                 | 14              | 84327.65      | 6023.40     | 589.83         | <.0001        |
|                    | Block(Env)          | 15              | 859.31        | 57.29       | 5.61           | <.0001        |
|                    | Geno                | 145             | 187829.60     | 1295.38     | 126.85         | <.0001        |
|                    | Geno*Env            | 2023            | 80189.85      | 39.64       | 3.88           | <.0001        |
| ETM                | Env                 | 14              | 45721.09      | 3265.79     | 551.85         | <.0001        |
|                    | Block(Env)          | 15              | 195.12        | 13.01       | 2.20           | 0.005         |
|                    | Geno                | 145             | 380540.56     | 2624.42     | 443.47         | <.0001        |
|                    | Geno*Env            | 2023            | 67766.03      | 33.50       | 5.66           | <.0001        |

4  
5 <sup>a</sup> ETF, number of days to flowering; FTM, number of days from flowering to maturity; and ETM, number of days  
6 to maturity; <sup>b</sup> Block(Env) means the block nested within environments; Env means environment; Geno means  
7 genotype; and Geno\*Env means genotype by environment interaction; <sup>c</sup> degree of freedom.
