# Supplementary material
Source: publisher figshare collection journal article supplement (https://plos.figshare.com/articles/dataset/_/3914580)
Supplement: Supplementary file [file 1]

**S2 Table. Analysis of variance (ANOVA) of the three traits across 15 high-dense plant environments.**

| Trait <sup>a</sup> | Source <sup>b</sup> | DF <sup>c</sup> | Sum of Square | Mean Square | F Value | Pr > F |
|--------------------|---------------------|-----------------|---------------|-------------|---------|--------|
| ETF                | Env                 | 14              | 54836.49      | 3916.89     | 1026.87 | <.0001 |
|                    | Block(Env)          | 15              | 142.42        | 9.49        | 2.49    | 0.0012 |
|                    | Geno                | 145             | 103276.38     | 712.25      | 186.73  | <.0001 |
|                    | Geno*Env            | 2030            | 37853.08      | 18.65       | 4.89    | <.0001 |
| FTM                | Env                 | 14              | 111049.33     | 7932.10     | 1038.52 | <.0001 |
|                    | Block(Env)          | 15              | 813.75        | 54.25       | 7.10    | <.0001 |
|                    | Geno                | 145             | 207108.83     | 1428.34     | 187.01  | <.0001 |
|                    | Geno*Env            | 2025            | 83471.99      | 41.22       | 5.40    | <.0001 |
| ETM                | Env                 | 14              | 69621.33      | 4972.95     | 870.14  | <.0001 |
|                    | Block(Env)          | 15              | 509.80        | 33.99       | 5.95    | <.0001 |
|                    | Geno                | 145             | 418779.88     | 2888.14     | 505.35  | <.0001 |
|                    | Geno*Env            | 2025            | 65530.49      | 32.36       | 5.66    | <.0001 |

<sup>a</sup> ETF, number of days to flowering; FTM, number of days from flowering to maturity; and ETM, number of days to maturity; <sup>b</sup> Block(Env) means the block nested within environments; Env means environment; Geno means genotype; and Geno\*Env means genotype by environment interaction; <sup>c</sup> degree of freedom.
