# Supplementary material
Source: publisher figshare collection journal article supplement (https://plos.figshare.com/articles/dataset/_/3914580)
Supplement: Supplementary file [file 1]

28 **S3 Fig. Phenotypic distribution of FTM.**

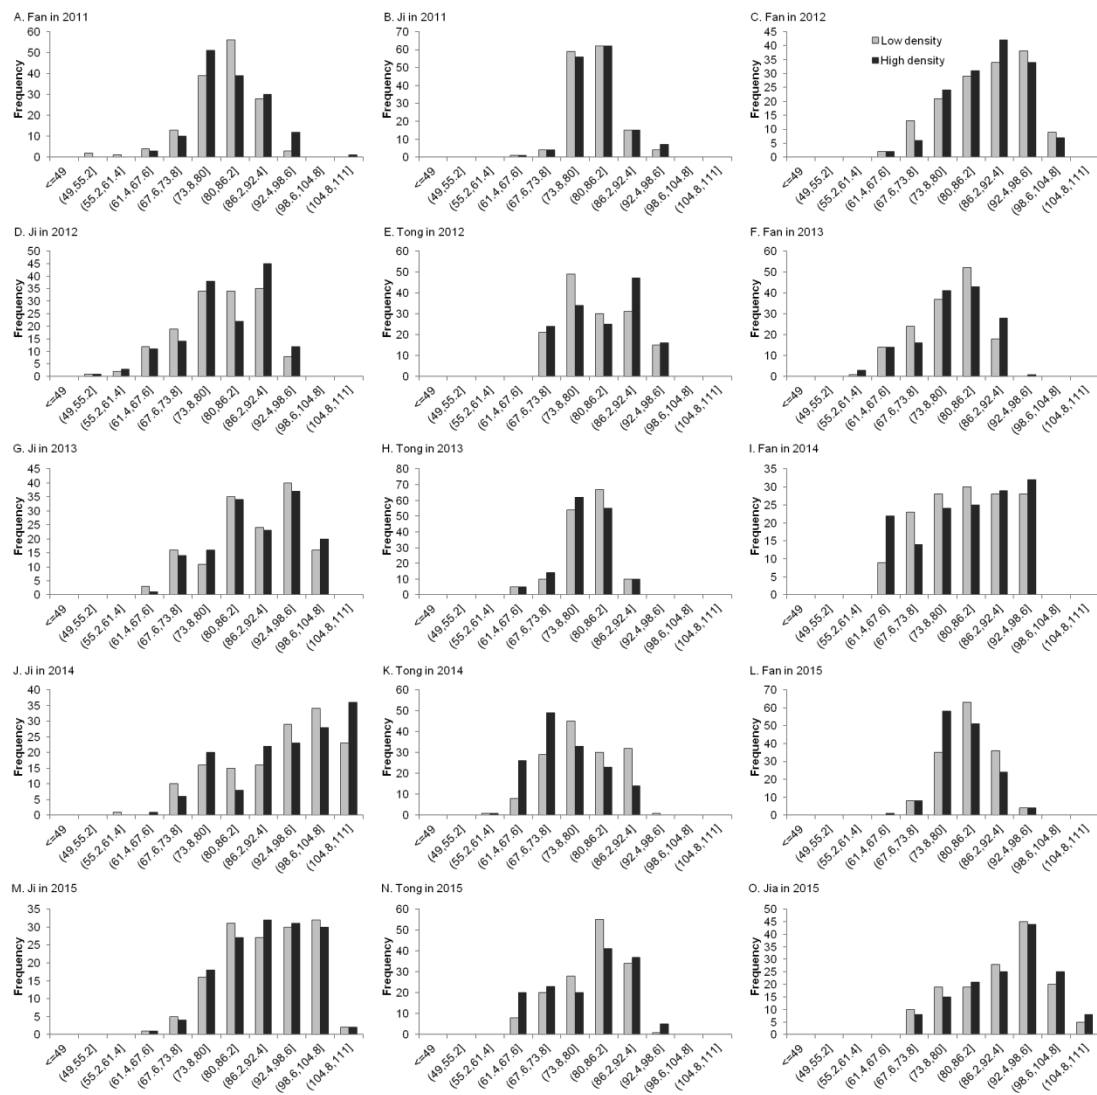

29

30
